# Supplementary material
Source: Springer Nature journal article supplement (https://www.springermedizin.de/resource/supplementary/12957_2011_788_MOESM1_ESM.pdf/9565876)

**A**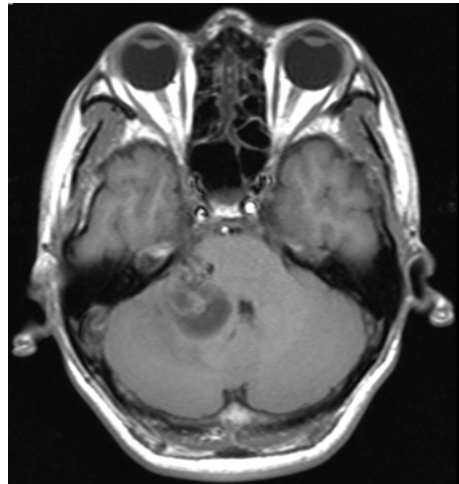**B**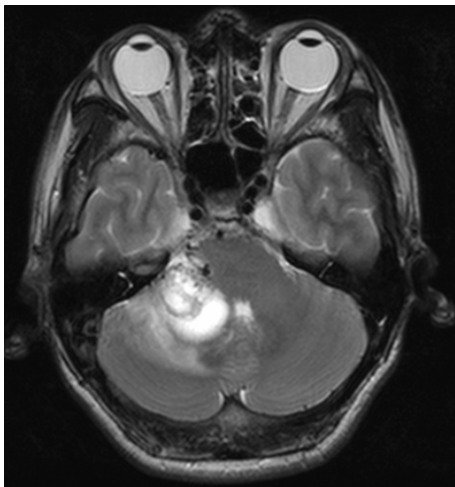**C**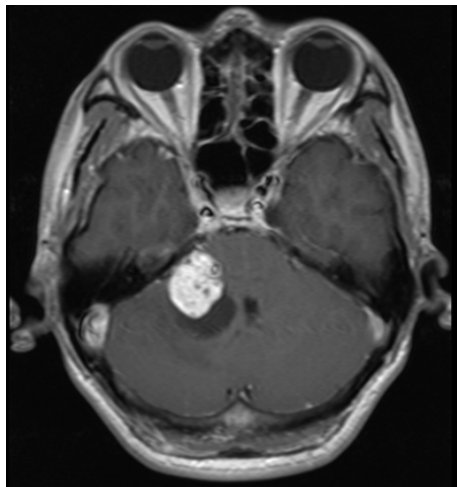

Supplement: MOESM1 [file 9565876]
